# Supplementary material
Source: PubMed Central journal article supplement (PMC2684837)

Supplementary

Fig 1A,B,C,D

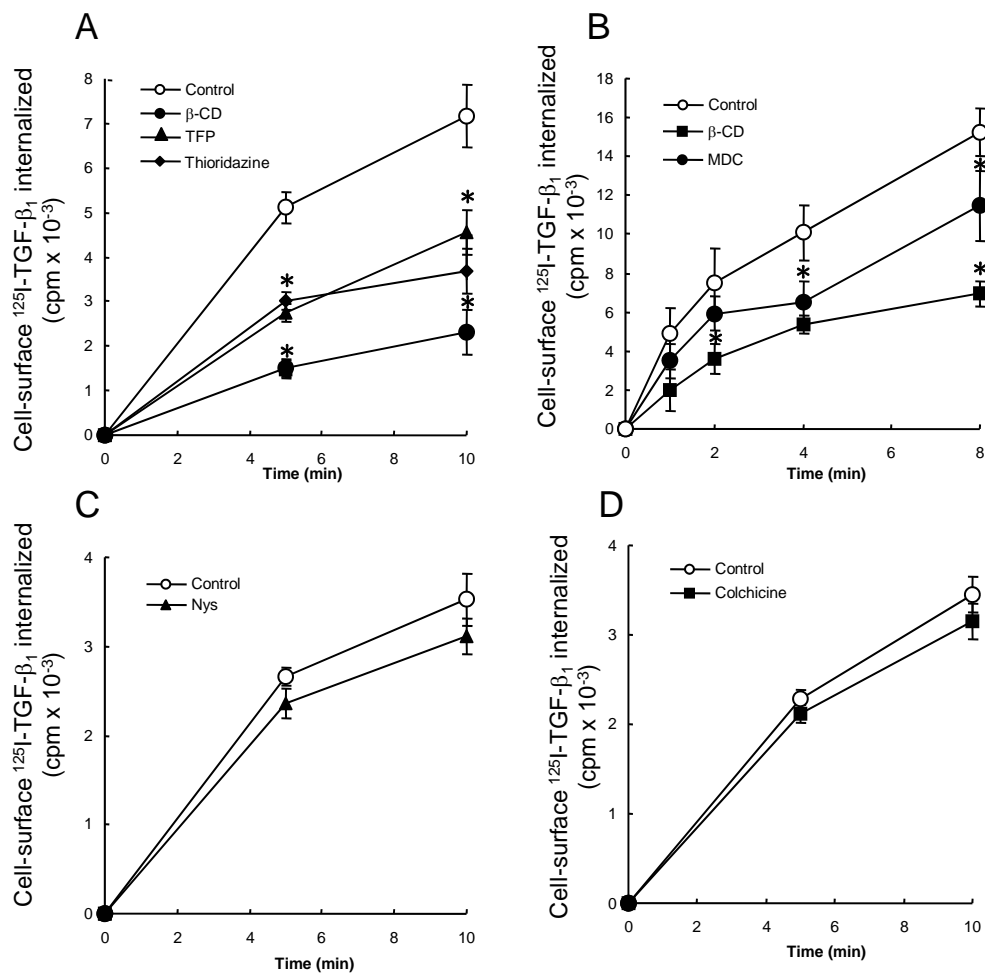

Supplement: supp_122_11_1863__1.pdf [file supp_122_11_1863__1.pdf]

Supplementary  
Fig. 1E,F,G,H

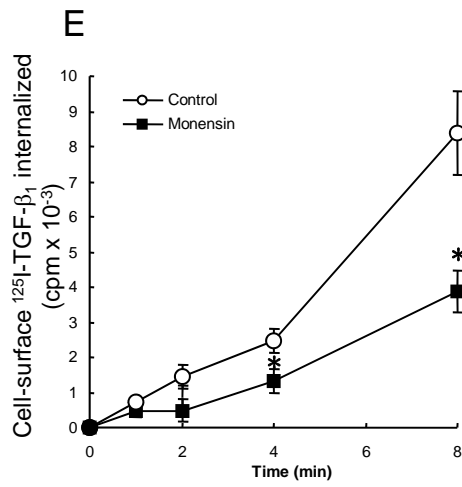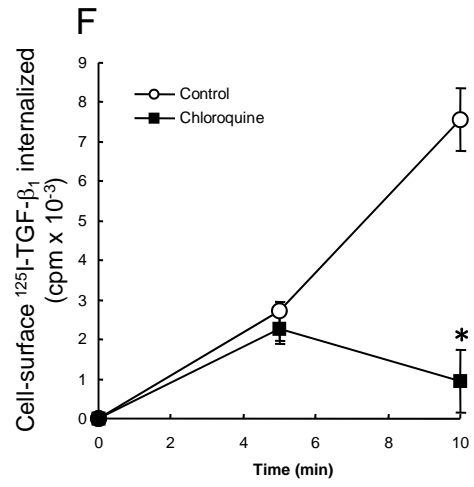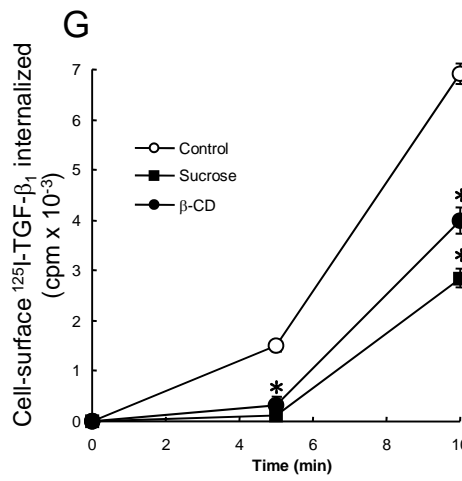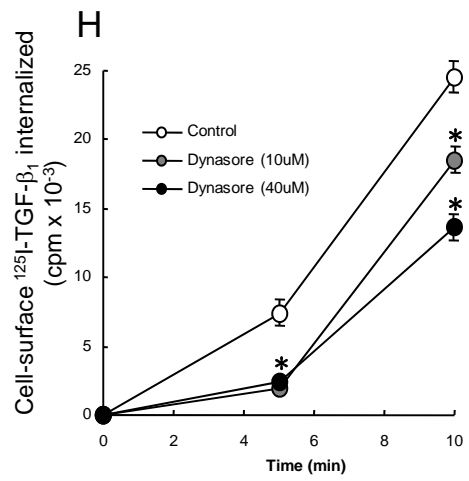

Supplement: supp_122_11_1863__2.pdf [file supp_122_11_1863__2.pdf]
